# Supplementary material for: A Scalable Approach for Discovering Conserved Active Subnetworks across Species
Source: PLOS journal article supplement (doi:10.1371/journal.pcbi.1001028), 2010-12-09
Supplement: S10 (10.1371/journal.pcbi.1001028.s010) [file journal.pcbi.1001028.s010]

Supplementary Table S2. Analysis of considerable overlap between the subnetworks of the two species obtained through MATISSE and our cross species algorithm

|                          | <b># Mouse subnetworks</b> | <b># Human subnetworks</b> | <b>Overlap (Jaccard index &gt; 0.2)</b> |
|--------------------------|----------------------------|----------------------------|-----------------------------------------|
| <b>MATISSE</b>           | 70                         | 92                         | 1                                       |
| <b>Our cross species</b> | 255                        | 255                        | 255                                     |
