# Supplementary material for: A Scalable Approach for Discovering Conserved Active Subnetworks across Species
Source: PLOS journal article supplement (doi:10.1371/journal.pcbi.1001028), 2010-12-09
Supplement: S12 (10.1371/journal.pcbi.1001028.s012) [file journal.pcbi.1001028.s012]

Supplementary Table S4. Summary of *Homo sapiens* microarray data

| Set | Accession Number | Description                                              | Number of Samples | Reference |
|-----|------------------|----------------------------------------------------------|-------------------|-----------|
| 1   | GSE8884          | hESC differentiation into hemangioblasts                 | 6                 | [1]       |
| 2   | GSE9865          | Reprogramming of dermal fibroblasts                      | 13                | [2]       |
| 3   | GSE7234          | Expression profile of karyotypically abnormal hESC lines | 4                 | -         |
| 4   | GSE9086          | hESC differentiation into hemangioblasts                 | 13                | [1]       |
| 5   | GSE6561          | Culture adaptation of hESCs                              | 4                 | [3]       |
| 6   | GSE9832          | Reprogramming of human somatic cells                     | 16                | [4]       |
| 7   | GSE9709          | hiPSCs from neonatal cells                               | 13                | [5]       |
| 8   | GSE9940          | Neural differentiation of hESCs                          | 18                | -         |
| 9   | GSE7896          | S1P mediated transcriptional regulation in hESCs         | 8                 | [6]       |
| 10  | GSE12390         | High-efficiency system for hiPSC generation              | 21                | [7]       |
| 11  | GSE12034         | Transcriptome of human oocytes                           | 6                 | [8]       |
| 12  | GSE10809         | SOX7 and SOX17 over-expressing hESC lines                | 8                 | [9]       |
| 13  | GSE11350         | hiPSCs from adult human testes                           | 12                | -         |

1. Lu SJ, Hipp JA, Feng Q, Hipp JD, Lanza R, et al. (2007) GeneChip analysis of human embryonic stem cell differentiation into hemangioblasts: an in silico dissection of mixed phenotypes. *Genome Biol* 8: R240.
2. Lowry WE, Richter L, Yachechko R, Pyle AD, Tchieu J, et al. (2008) Generation of human induced pluripotent stem cells from dermal fibroblasts. *Proc Natl Acad Sci U S A* 105: 2883-2888.
3. Baker DE, Harrison NJ, Maltby E, Smith K, Moore HD, et al. (2007) Adaptation to culture of human embryonic stem cells and oncogenesis in vivo. *Nat Biotechnol* 25: 207-215.
4. Park IH, Zhao R, West JA, Yabuuchi A, Huo H, et al. (2008) Reprogramming of human somatic cells to pluripotency with defined factors. *Nature* 451: 141-146.

5. Masaki H, Ishikawa T, Takahashi S, Okumura M, Sakai N, et al. (2007) Heterogeneity of pluripotent marker gene expression in colonies generated in human iPS cell induction culture. *Stem Cell Res* 1: 105-115.
6. Avery K, Avery S, Shepherd J, Heath PR, Moore H (2008) Sphingosine-1-phosphate mediates transcriptional regulation of key targets associated with survival, proliferation, and pluripotency in human embryonic stem cells. *Stem Cells Dev* 17: 1195-1205.
7. Maherali N, Ahfeldt T, Rigamonti A, Utikal J, Cowan C, et al. (2008) A high-efficiency system for the generation and study of human induced pluripotent stem cells. *Cell Stem Cell* 3: 340-345.
8. Kocabas AM, Crosby J, Ross PJ, Otu HH, Beyhan Z, et al. (2006) The transcriptome of human oocytes. *Proc Natl Acad Sci U S A* 103: 14027-14032.
9. Seguin CA, Draper JS, Nagy A, Rossant J (2008) Establishment of endoderm progenitors by SOX transcription factor expression in human embryonic stem cells. *Cell Stem Cell* 3: 182-195.
