# Supplementary material for: A Scalable Approach for Discovering Conserved Active Subnetworks across Species
Source: PLOS journal article supplement (doi:10.1371/journal.pcbi.1001028), 2010-12-09
Supplement: S14 (10.1371/journal.pcbi.1001028.s014) [file journal.pcbi.1001028.s014]

301 Moved Permanently

# Moved Permanently

The document has moved here.

---

Apache Server at www.ploscompbiol.org Port 80
