# Supplementary material for: A Scalable Approach for Discovering Conserved Active Subnetworks across Species
Source: PLoS Comput Biol. 2010 Dec 9;6(12):e1001028. doi: 10.1371/journal.pcbi.1001028 (PMC3000367; doi:10.1371/journal.pcbi.1001028)
Supplement: Table S1 — Overlap between human and mouse genes covered by MATISSE and our cross species algorithm. (0.17 MB PDF) [file pcbi.1001028.s009.pdf]

Supplementary Table S1. Overlap between human and mouse genes covered by MATISSE and our cross species algorithm

|                | # Mouse genes | # Human genes | Overlap |
|----------------|---------------|---------------|---------|
| <b>MATISSE</b> | 3256          | 3773          | 1619    |
| <b>neXus</b>   | 607           | 607           | 601     |
